# Supplementary material for: Electronic structure of polypyrrole composited with a low percentage of graphene nanofiller
Source: Royal Society of Chemistry journal article supplement (doi:10.1039/d0cp03258a), 2021-01-01
Supplement: d0cp03258a1.pdf [file d0cp03258a1.pdf]

## Supporting Information

### **Electronic structure of polypyrrole composited with low percent of graphene nanofiller**

*Zulqarnain Chughtai<sup>a</sup>, Muhammad Ali Hashmi<sup>b</sup>, Muhammad Yar<sup>a</sup> and Khurshid Ayub<sup>a,\*</sup>*

<sup>a</sup>Department of Chemistry, COMSATS University, Abbottabad Campus, KPK, Pakistan 22060

<sup>b</sup>Department of Chemistry, University of Education, Attock Campus, Attock, Punjab, Pakistan 43600.

### **Correspondence**

**[Khurshid@cuiatd.edu.pk](mailto:Khurshid@cuiatd.edu.pk) (K.A)**

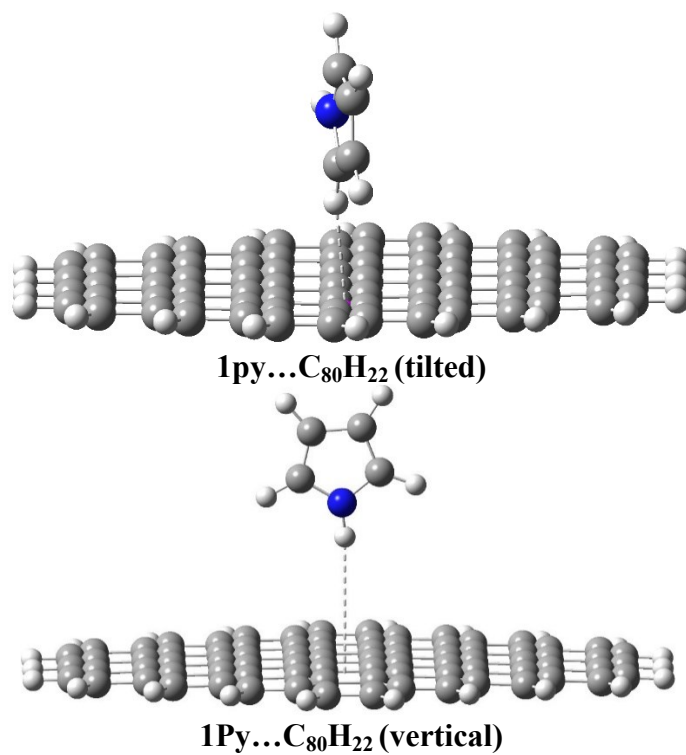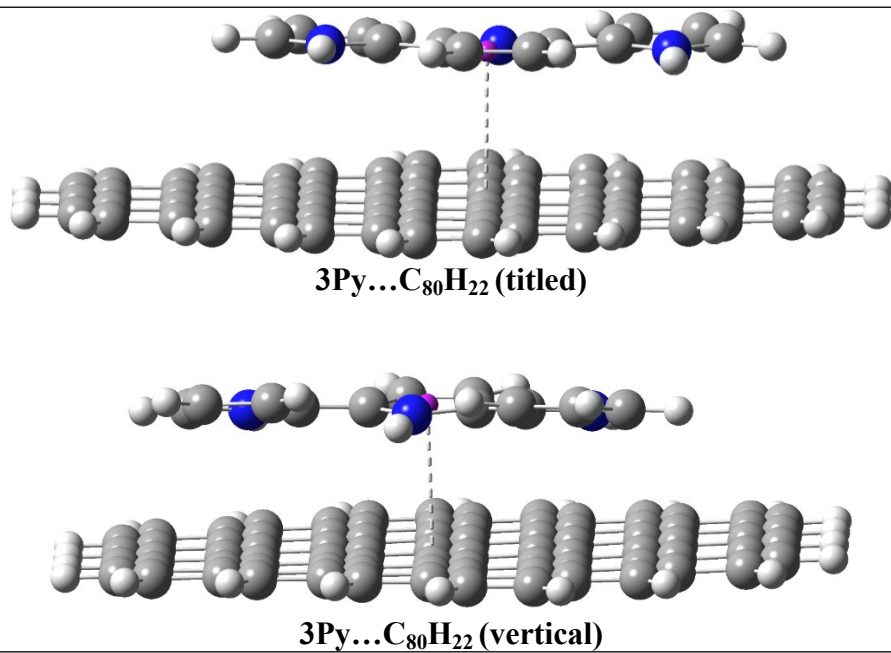

**Figure S1.** Optimized configuration of titled and vertical C<sub>80</sub>H<sub>22</sub>...nPy composite.

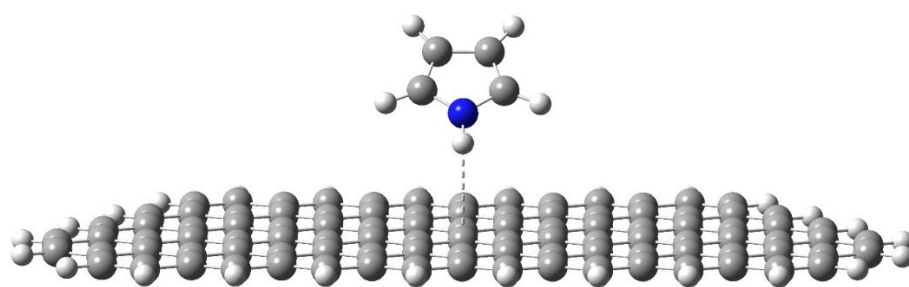

**1Py...C<sub>100</sub>H<sub>26</sub> (titled)**

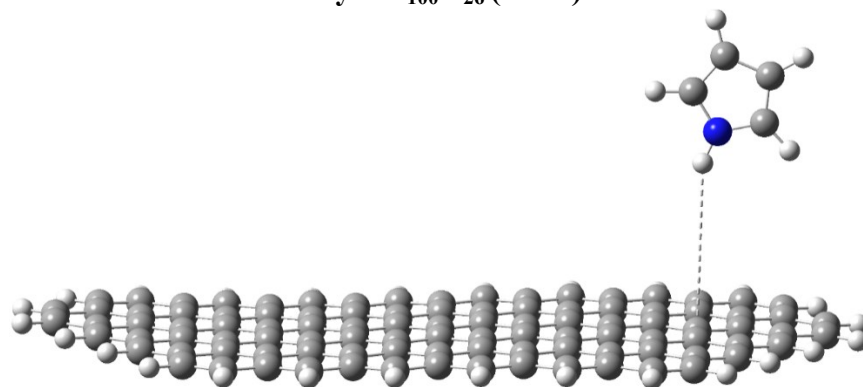

**1Py...C<sub>100</sub>H<sub>26</sub> (vertical)**

---

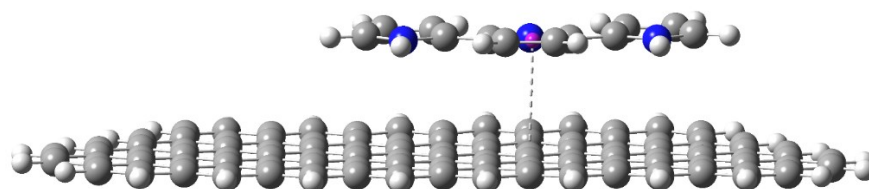

**3Py...C<sub>100</sub>H<sub>26</sub> (titled)**

---

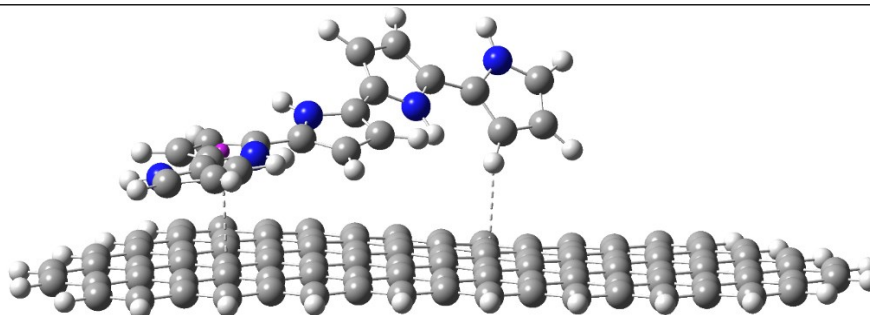

**5Py...C<sub>100</sub>H<sub>26</sub> (titled)**

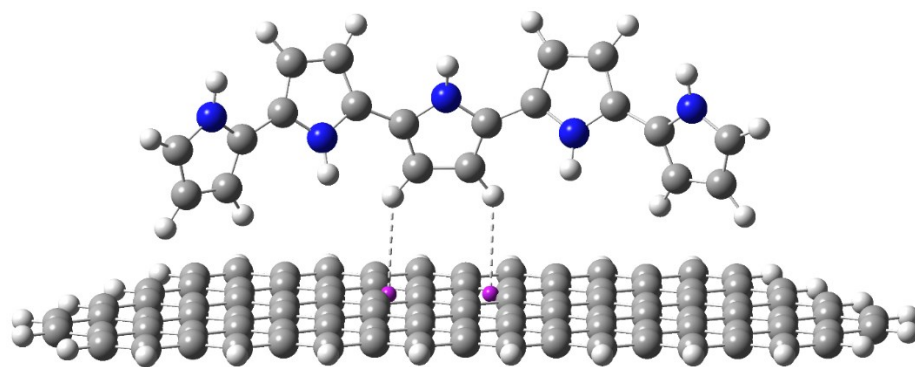

5Py@C<sub>100</sub>H<sub>26</sub> (vertical)

---

**Figure S2.** Optimized configuration of vertical C<sub>100</sub>H<sub>26</sub>...nPy composite

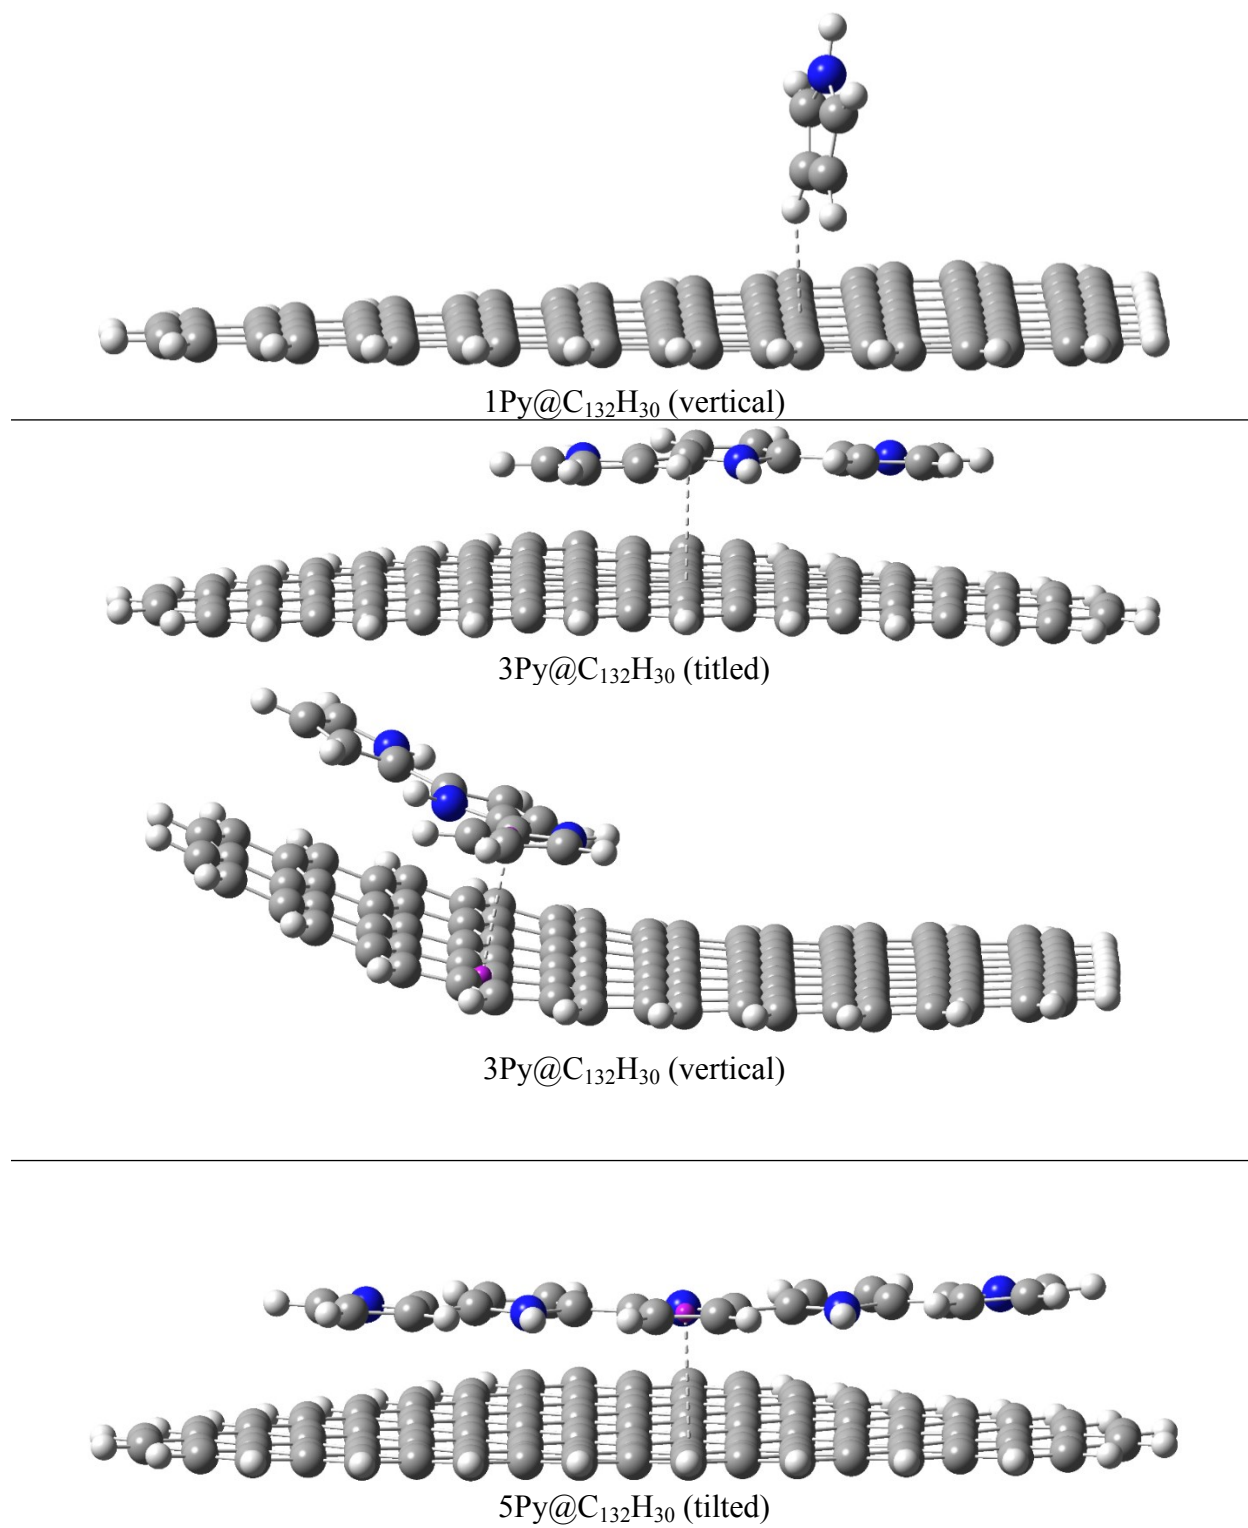

**Figure S3.** Optimized configuration of tilted and vertical C<sub>132</sub>H<sub>30</sub>...nPy composites

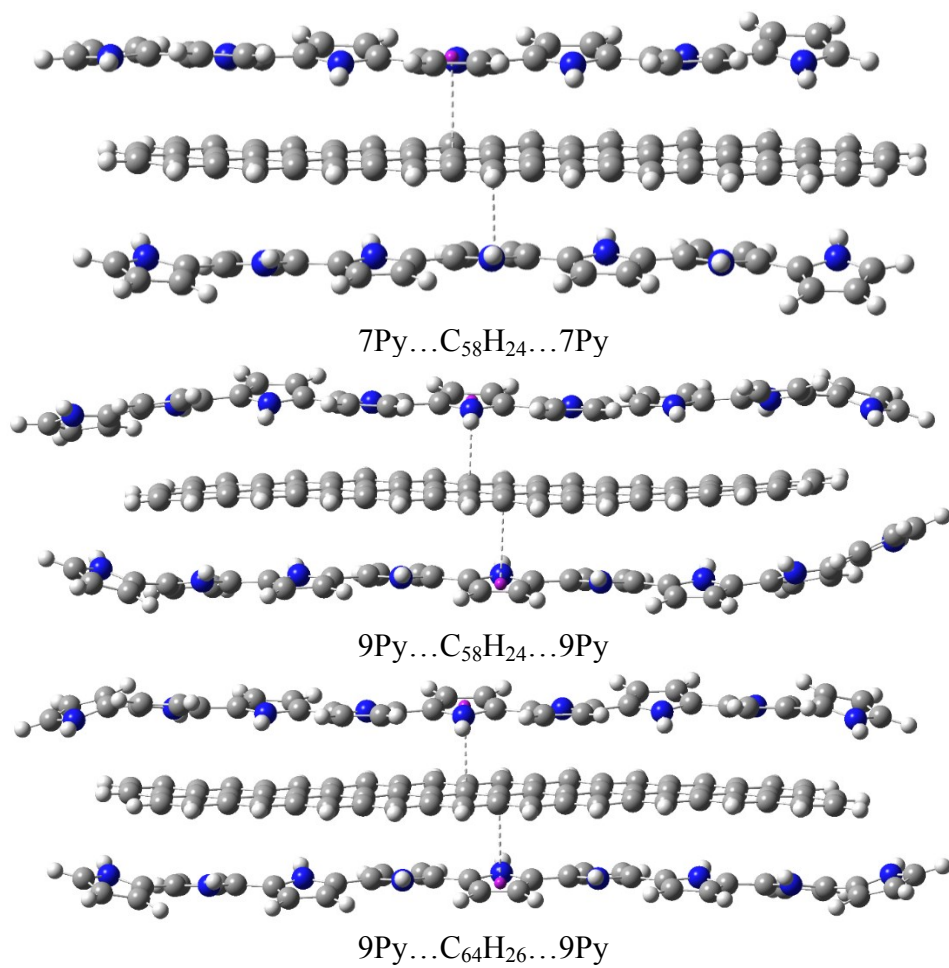

**Figure S3.** Optimized configuration of  $n\text{Py}\dots\text{C}_{58}\text{H}_{24}\dots n\text{Py}$  and  $n\text{Py}\dots\text{C}_{64}\text{H}_{26}\dots n\text{Py}$  composites

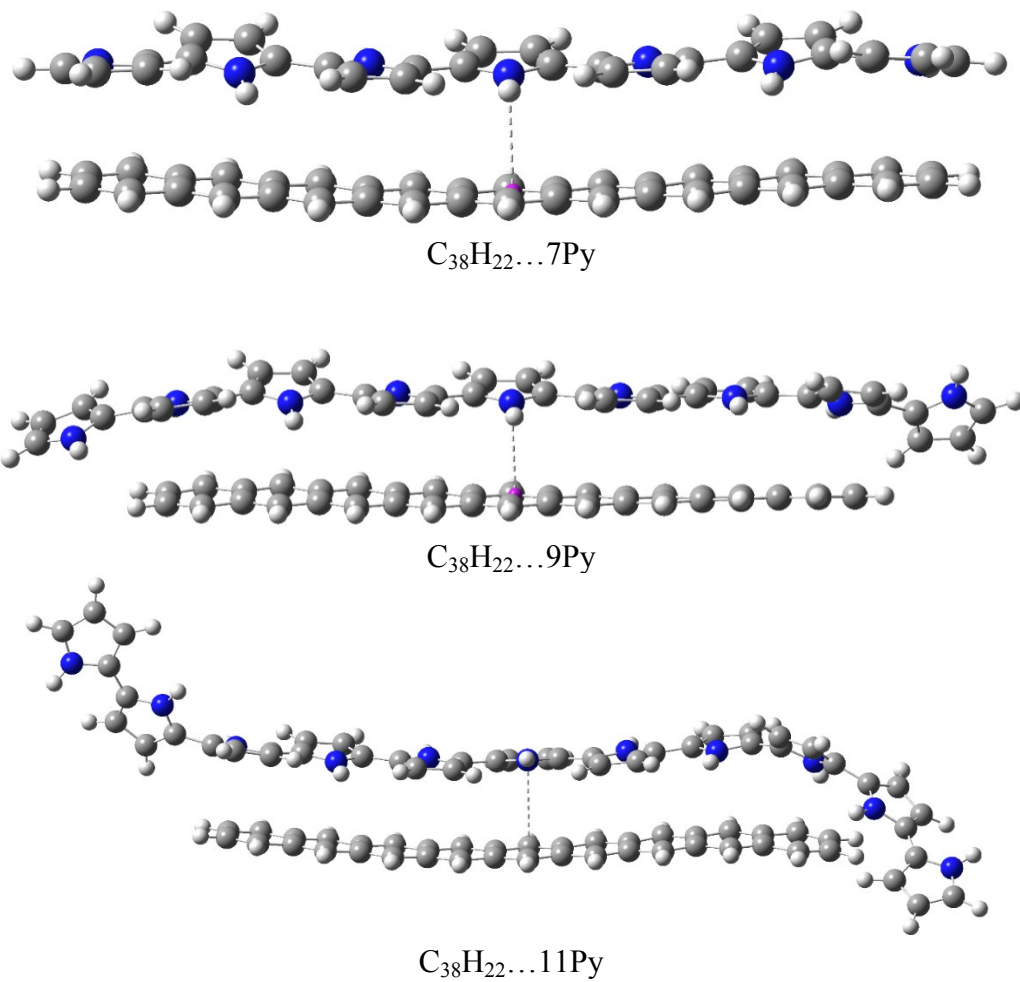

**Figure S4.** Optimized configuration of  $C_{38}H_{22} \dots nPy$  composites





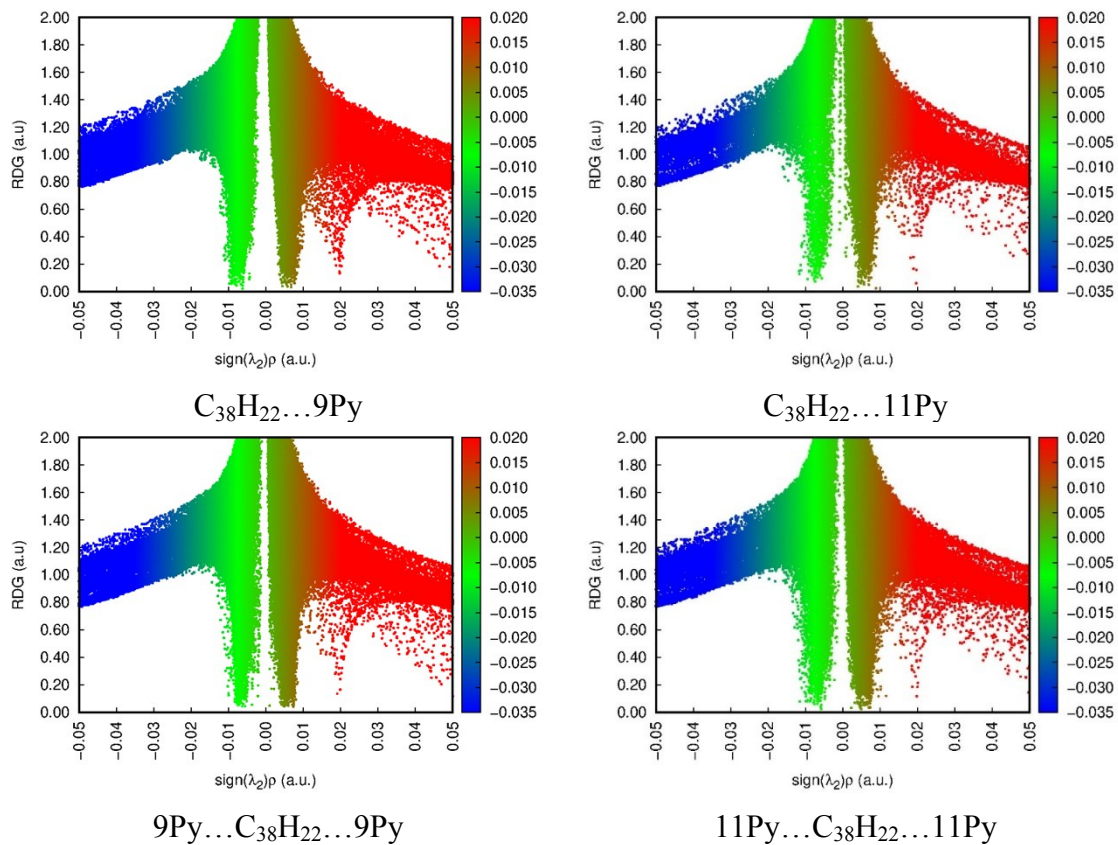

**Figure S5.** Isosurface 2D RDG scatter graph at isovalue of 0.5 a.u. of polypyrrole/graphene composite.

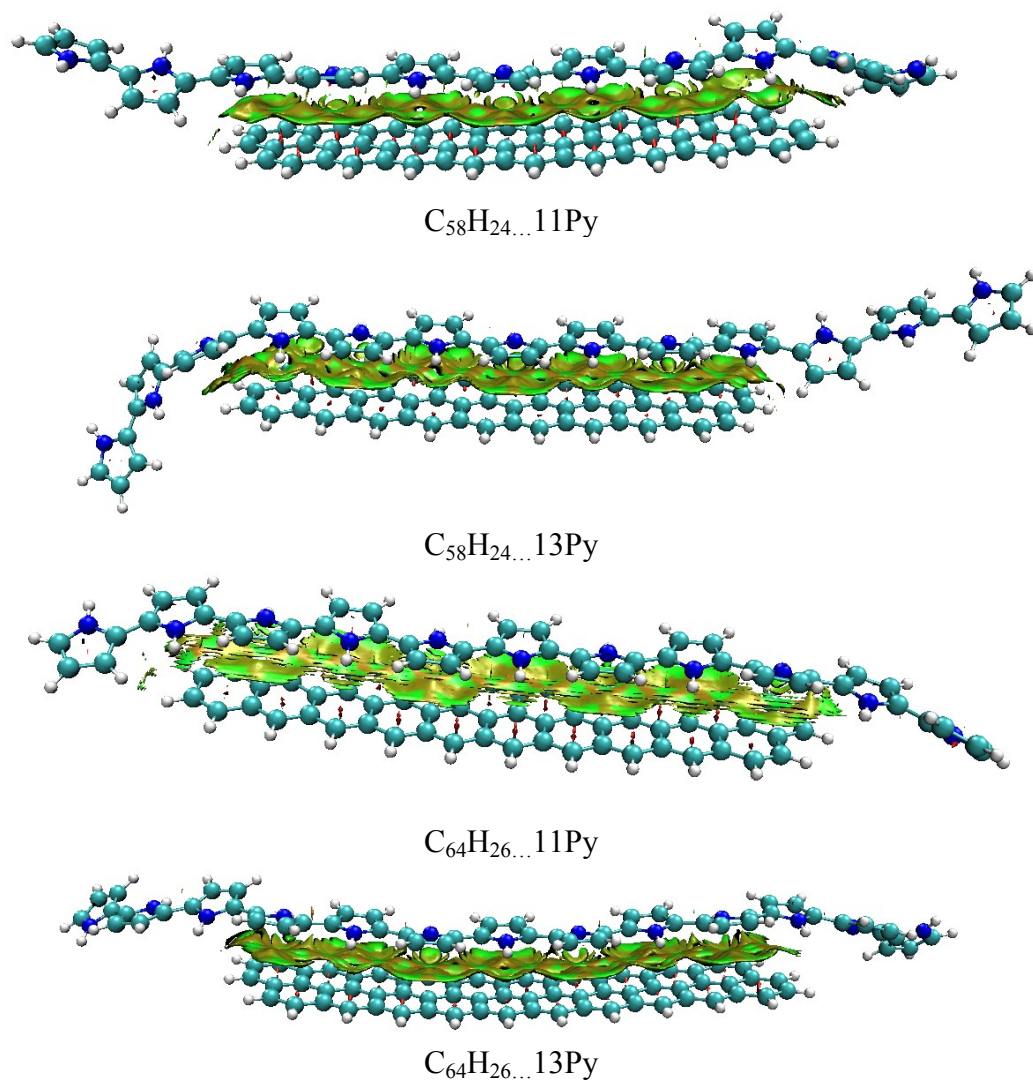

**Figure S6.** NCI analysis of optimized geometries of  $C_{58}H_{24}$  and  $C_{64}H_{26} \dots nPy$  composite with isosurface value of 0.5 a.u.

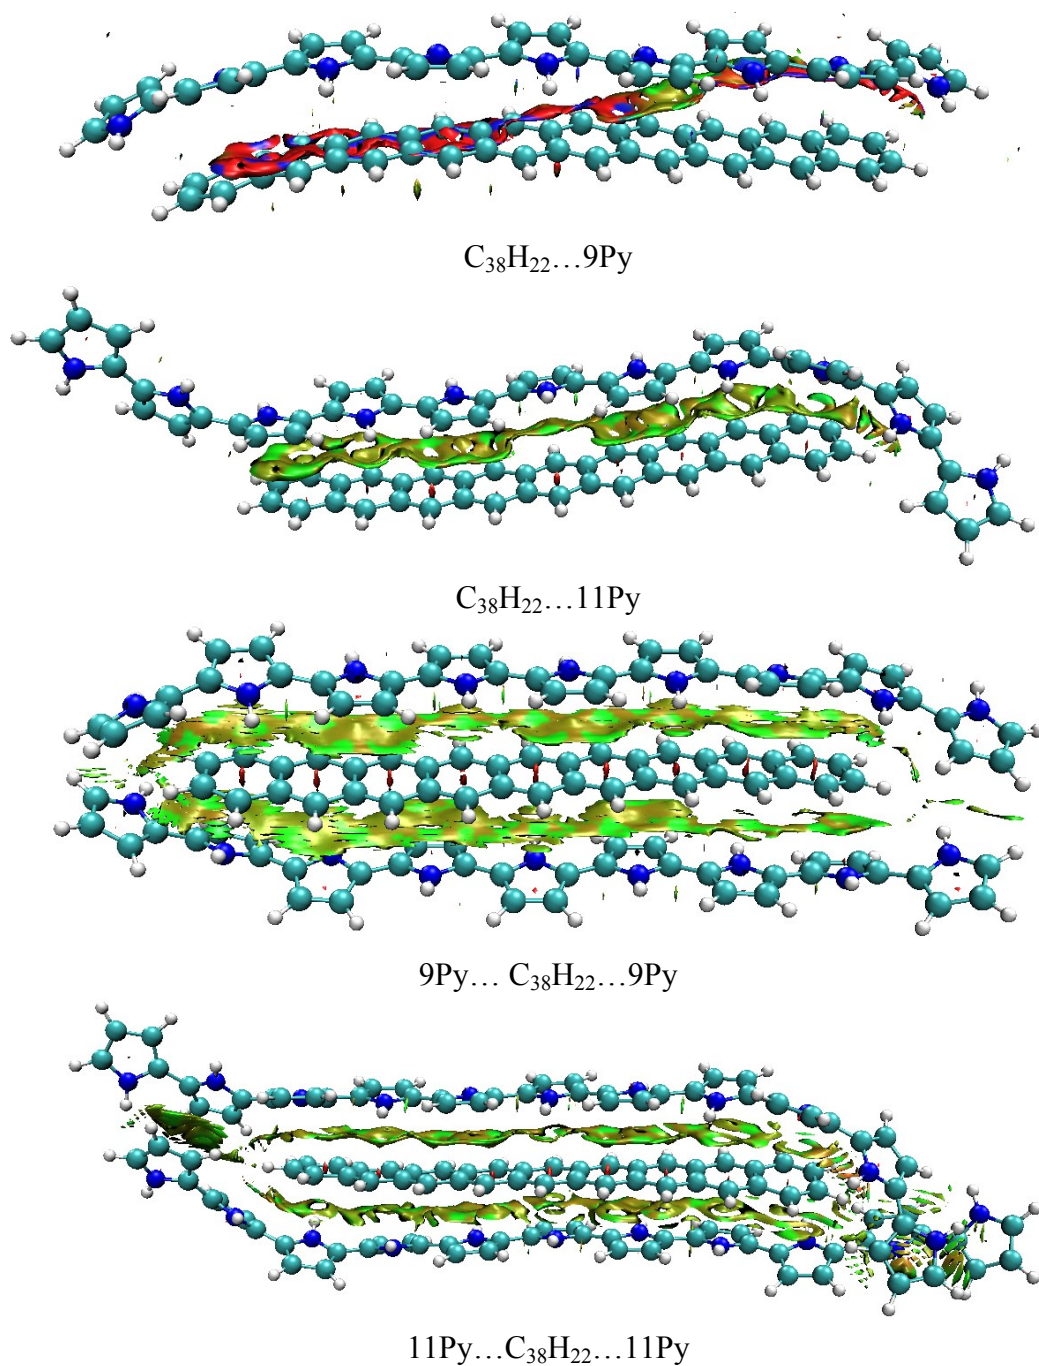

**Figure 7.** NCI analysis of optimized geometries of  $nPy \dots C_{38}H_{22}$  and  $nPy \dots C_{38}H_{22} \dots nPy$  composite with isosurface value of 0.5 a.u.

**Table S1:** Values of BCPs parameters of  $C_{80}H_{22} \dots 1Py$  and  $C_{80}H_{22} \dots 3Py$  composites resulted through QTAIM analysis.

| <b>Composite</b>                           | <b>CP #</b> | <b><math>\rho</math></b> | <b><math>\nabla^2\rho</math></b> | <b><math>G(r)</math></b> | <b><math>V(r)</math></b> | <b><math>H(r)</math></b> | <b>Eint</b> |
|--------------------------------------------|-------------|--------------------------|----------------------------------|--------------------------|--------------------------|--------------------------|-------------|
| <b><math>C_{80}H_{22} \dots 1Py</math></b> | 1           | 0.00620                  | 0.01904                          | 0.00393                  | -0.00311                 | 0.00083                  | -0.98       |
|                                            | 2           | 0.00659                  | 0.01996                          | 0.00436                  | -0.00373                 | 0.00063                  | -1.17       |
|                                            | 3           | 0.00583                  | 0.01658                          | 0.00345                  | -0.00276                 | 0.00069                  | -0.86       |
|                                            | 4           | 0.00493                  | 0.01441                          | 0.00296                  | -0.00231                 | 0.00065                  | -0.72       |
| <b><math>C_{80}H_{22} \dots 3Py</math></b> | 1           | 0.00528                  | 0.01653                          | 0.00355                  | -0.00298                 | 0.00058                  | -0.93       |
|                                            | 2           | 0.00699                  | 0.02015                          | 0.00420                  | -0.00337                 | 0.00084                  | -1.06       |
|                                            | 3           | 0.00649                  | 0.02036                          | 0.00416                  | -0.00322                 | 0.00093                  | -1.01       |
|                                            | 4           | 0.00620                  | 0.01753                          | 0.00367                  | -0.00296                 | 0.00071                  | -0.93       |
|                                            | 5           | 0.00623                  | 0.01786                          | 0.00371                  | -0.00295                 | 0.00076                  | -0.93       |
|                                            | 6           | 0.00648                  | 0.02086                          | 0.00430                  | -0.00339                 | 0.00091                  | -1.06       |
|                                            | 7           | 0.00647                  | 0.02033                          | 0.00439                  | -0.00370                 | 0.00069                  | -1.16       |
|                                            | 8           | 0.00668                  | 0.01910                          | 0.00395                  | -0.00312                 | 0.00083                  | -0.98       |
|                                            | 9           | 0.00678                  | 0.01987                          | 0.00409                  | -0.00321                 | 0.00088                  | -1.01       |
|                                            | 10          | 0.00665                  | 0.02006                          | 0.00441                  | -0.00381                 | 0.00060                  | -1.20       |
|                                            | 11          | 0.00686                  | 0.01978                          | 0.00411                  | -0.00327                 | 0.00084                  | -1.03       |

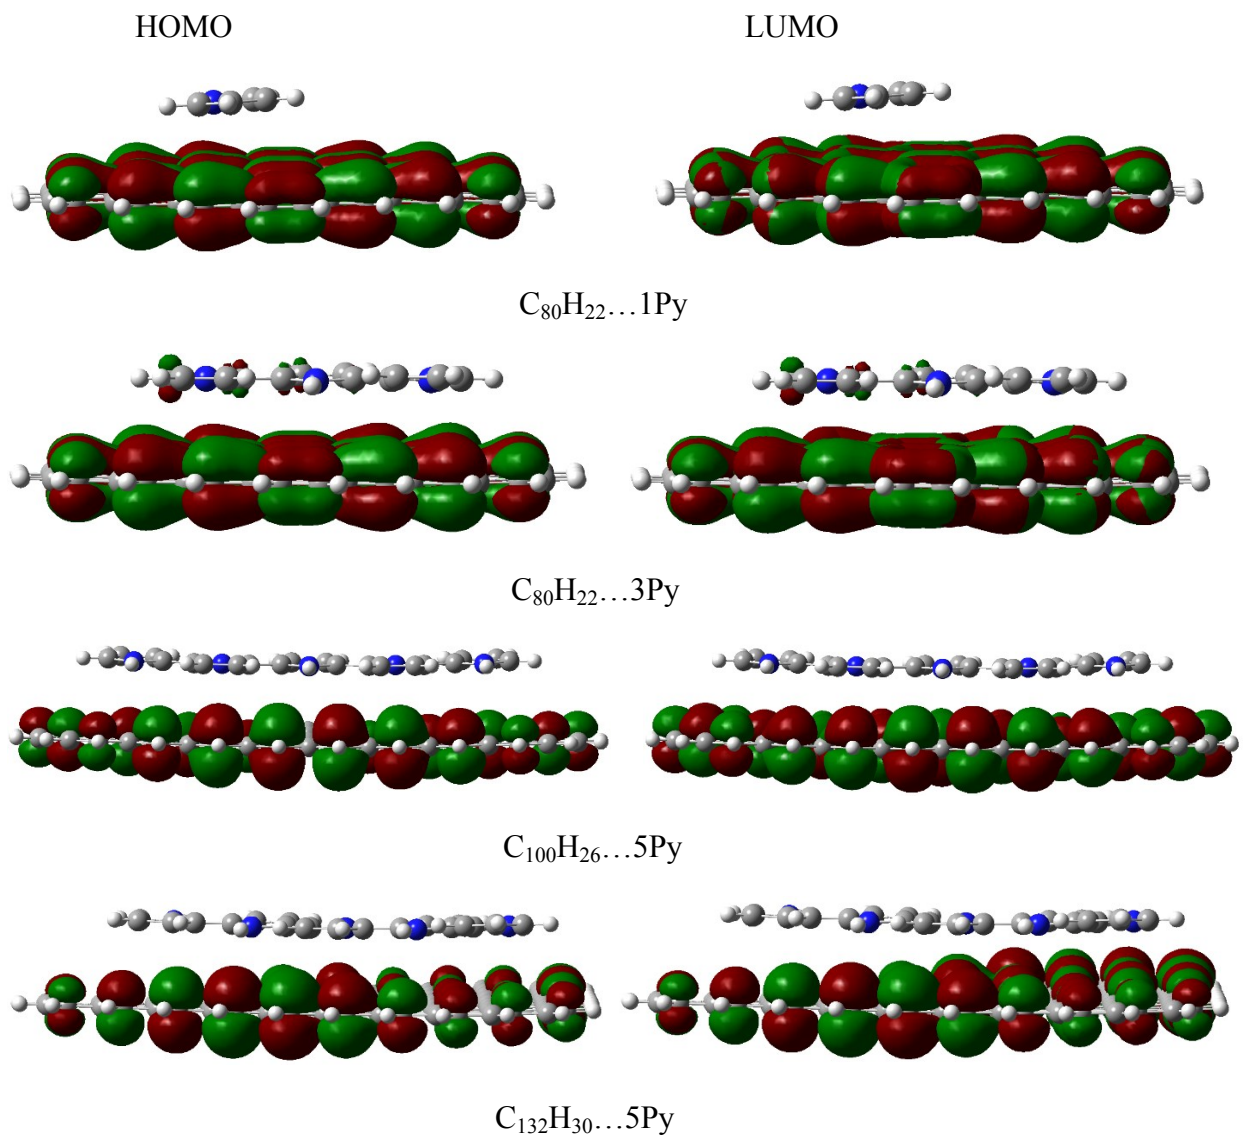

**Figure S8.** HOMO-LUMO orbitals of  $\pi$  stacked orientation of  $C_{80}H_{22}\dots 1Py$ ,  $C_{80}H_{22}\dots 3Py$ ,  $C_{100}H_{26}\dots 5Py$  and  $C_{132}H_{30}\dots 5Py$  composites.

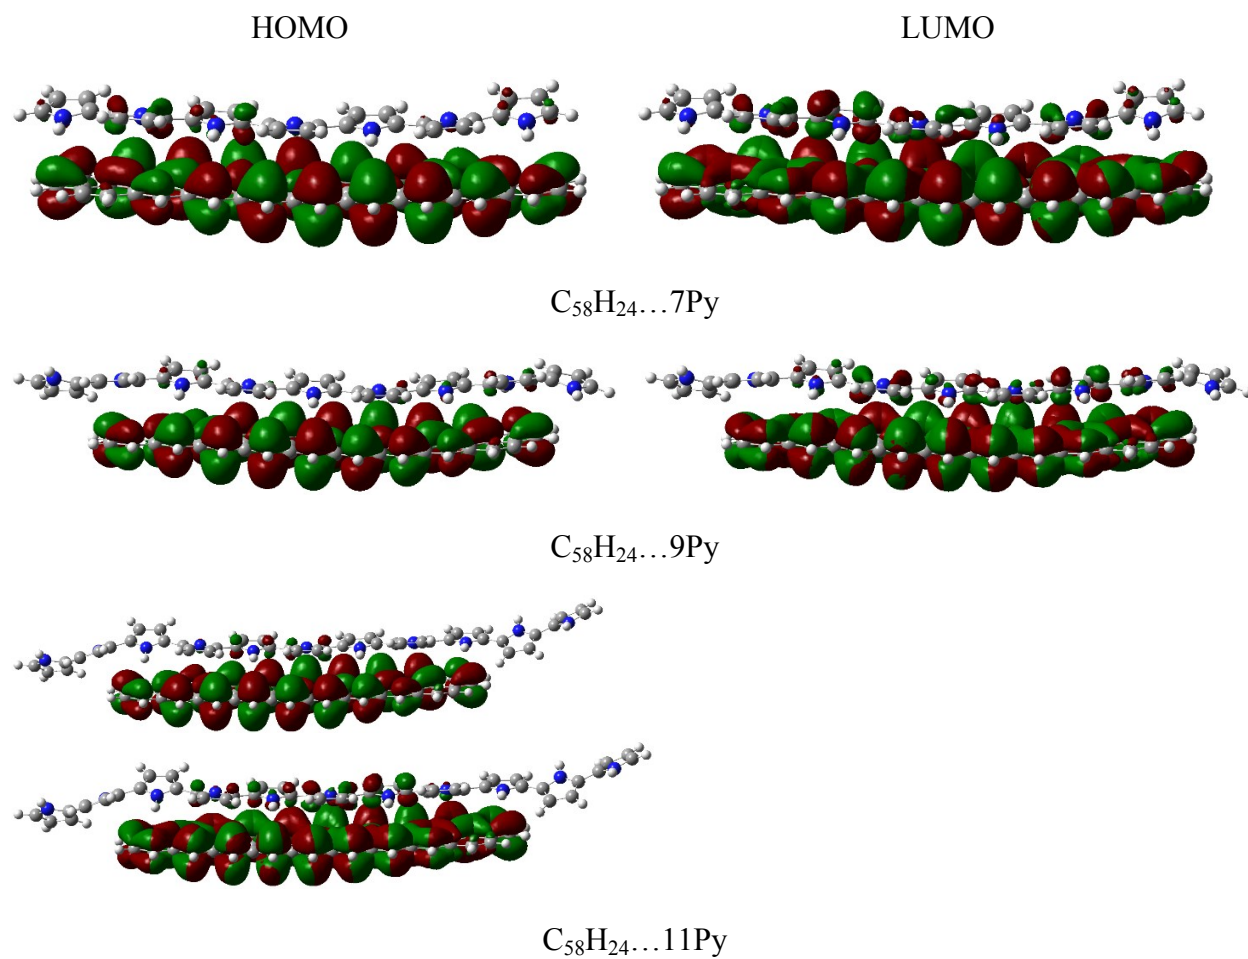

**Figure S9.** HOMO-LUMO orbitals of  $\pi$  stacked orientation of  $C_{58}H_{24}\dots nPy$  composites.

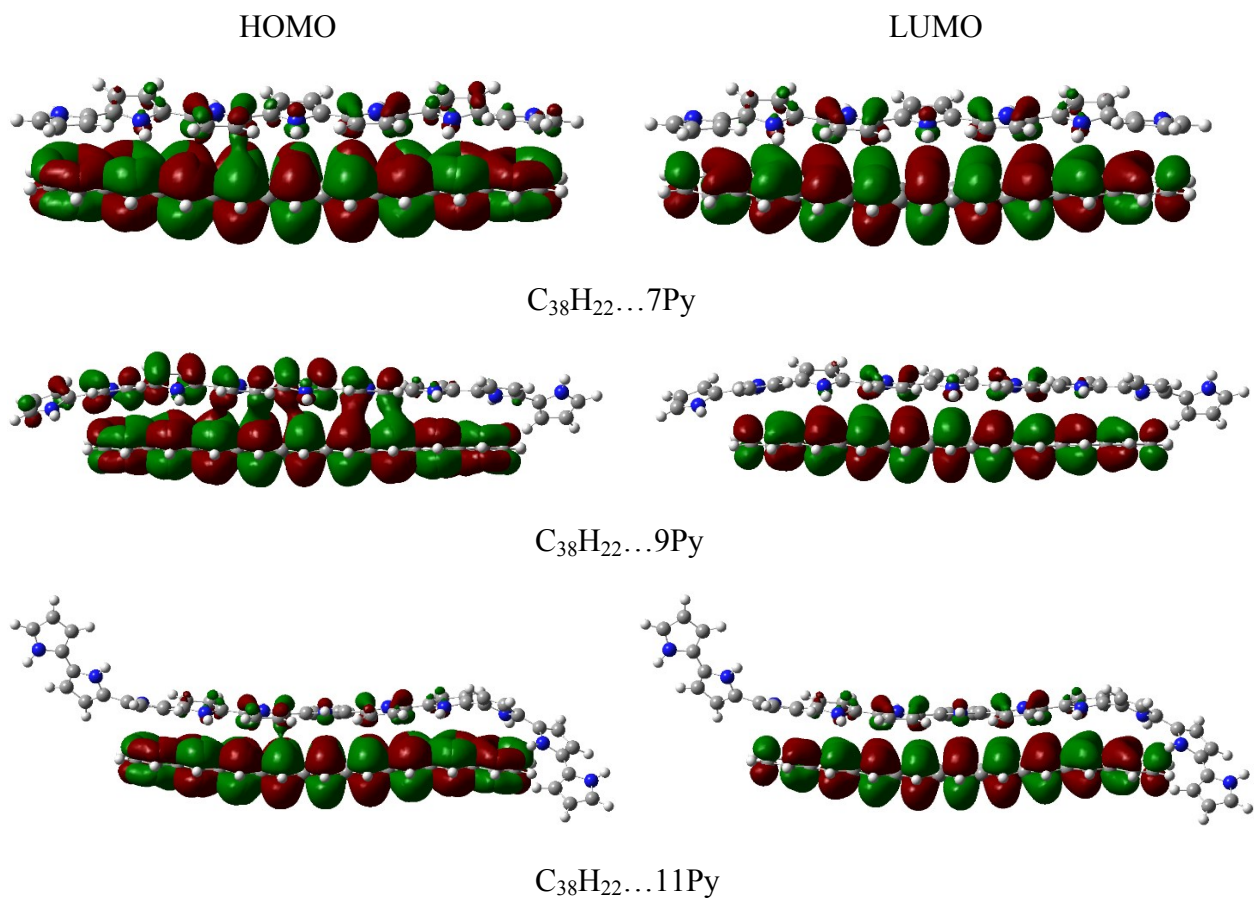

**Figure S10.** HOMO-LUMO orbitals of  $C_{38}H_{22}\dots nPy$  composites.
